# Supplementary figures and images for: Transforming layered MoS2 into functional MoO2 nanowires
Source: Royal Society of Chemistry journal article supplement (doi:10.1039/c9nr03346g), 2019-01-01

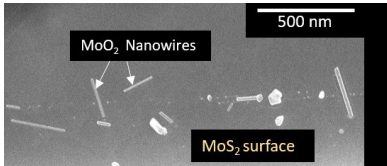

Supplement: c9nr03346g9.pdf [file c9nr03346g9.pdf]
